# Supplementary material for: Adult parenteral nutrition in the North of England: a region-wide audit
Source: PubMed Central journal article supplement — BMJ Open. 2017 Jan 10;7(1):e012663. doi: 10.1136/bmjopen-2016-012663 (PMC5253550; doi:10.1136/bmjopen-2016-012663), 2017-01-10
Supplement: bmjopen-2016-012663supp.pdf [file bmjopen-2016-012663supp.pdf]

## Parenteral Nutrition Audit – Regional

|           |  |
|-----------|--|
| Hospital: |  |
| Age:      |  |
| Gender:   |  |

### Patient / Admission details

|                                                                                                                          |                        |                          |                         |                          |
|--------------------------------------------------------------------------------------------------------------------------|------------------------|--------------------------|-------------------------|--------------------------|
| Weight:                                                                                                                  | In Kilos               |                          | Not recorded            | <input type="checkbox"/> |
| Height:                                                                                                                  | In cm                  |                          | Not recorded            | <input type="checkbox"/> |
| Date of admission                                                                                                        |                        |                          |                         |                          |
| Was the admission:                                                                                                       | A planned admission    | <input type="checkbox"/> | Inter-hospital transfer | <input type="checkbox"/> |
|                                                                                                                          | An emergency admission | <input type="checkbox"/> | Unknown                 | <input type="checkbox"/> |
| Date of referral for PN                                                                                                  |                        |                          | Not available           | <input type="checkbox"/> |
| Date of decision to commence of PN                                                                                       |                        |                          |                         |                          |
| Date and time infusion commenced                                                                                         |                        |                          |                         |                          |
| Was there a delay of more than 24hr between making the decision that the patient required PN and the commencement of PN? |                        |                          | Yes/No                  |                          |
| If 'Yes', please expand on your answer                                                                                   |                        |                          |                         |                          |
| Day of week infusion commenced                                                                                           | Weekday                | <input type="checkbox"/> | Weekend/Bank holiday    | <input type="checkbox"/> |

### Patient Assessment

|                                                                     |                                            |                          |                                         |                          |
|---------------------------------------------------------------------|--------------------------------------------|--------------------------|-----------------------------------------|--------------------------|
| Was a nutritional assessment carried out before PN commenced        | Yes/No                                     |                          |                                         |                          |
| If 'Yes', what did the assessment involve (tick all that apply)?    | Clinical assessment                        | <input type="checkbox"/> | Malnutrition screening tool (e.g. MUST) | <input type="checkbox"/> |
|                                                                     | Standard electrolytes Magnesium, phosphate | <input type="checkbox"/> | Oral intake                             | <input type="checkbox"/> |
|                                                                     | Anthropometry                              | <input type="checkbox"/> | Other                                   | <input type="checkbox"/> |
|                                                                     | Nutritional Requirements                   | <input type="checkbox"/> | Risk of re-feeding                      | <input type="checkbox"/> |
| Where any electrolyte abnormalities corrected before commencing PN? |                                            |                          | Yes/No                                  |                          |
| Who made the decision that PN should be commenced                   | Nurse                                      | <input type="checkbox"/> |                                         |                          |

|                                                                                           |                                                    |                          |                                                 |                          |
|-------------------------------------------------------------------------------------------|----------------------------------------------------|--------------------------|-------------------------------------------------|--------------------------|
| (tick multiple if required)?                                                              | Dietician                                          | <input type="checkbox"/> | Grade/Speciality                                |                          |
|                                                                                           | Doctor                                             | <input type="checkbox"/> | Grade/Speciality                                |                          |
|                                                                                           | Unknown                                            | <input type="checkbox"/> |                                                 |                          |
|                                                                                           | Other                                              | <input type="checkbox"/> |                                                 |                          |
| If 'Other', please state                                                                  |                                                    |                          |                                                 |                          |
| Were they members of the nutrition team?                                                  |                                                    |                          | Yes/No                                          |                          |
| What type of PN was given first?                                                          | Multi-chamber bag ('off the shelf')                | <input type="checkbox"/> | Bespoke bag specially ordered from manufacturer | <input type="checkbox"/> |
|                                                                                           | Multi-chamber bag ('off the shelf') with additives | <input type="checkbox"/> | Other                                           | <input type="checkbox"/> |
|                                                                                           | Bespoke bag (made in hospital pharmacy)            | <input type="checkbox"/> | Not documented                                  | <input type="checkbox"/> |
| Were intravenous vitamins (e.g. pabrinex) given?                                          |                                                    |                          | Yes/No                                          |                          |
| Were the PN prescription requirements documented in the case notes?                       |                                                    |                          | Yes/No                                          |                          |
| If 'Yes', were these of adequate detail                                                   |                                                    |                          | Yes/No                                          |                          |
| Who reviewed the patient during the period they were on PN (tick multiple if required)?   | Nurse                                              | <input type="checkbox"/> |                                                 |                          |
|                                                                                           | Doctor                                             | <input type="checkbox"/> | Grade/Speciality                                |                          |
|                                                                                           | Dietician                                          | <input type="checkbox"/> | Grade/Speciality                                |                          |
|                                                                                           | Pharmacist                                         | <input type="checkbox"/> |                                                 |                          |
|                                                                                           | Unknown                                            | <input type="checkbox"/> |                                                 |                          |
|                                                                                           | Other                                              | <input type="checkbox"/> |                                                 |                          |
| If 'Other', please state                                                                  |                                                    |                          |                                                 |                          |
| How often was the patient reviewed with respect to PN in the first 2 weeks?               | Daily (7 days)                                     | <input type="checkbox"/> | 1-2 days/week                                   | <input type="checkbox"/> |
|                                                                                           | Daily (working week)                               | <input type="checkbox"/> | <1 day/week                                     | <input type="checkbox"/> |
|                                                                                           | 3-4 days/week                                      | <input type="checkbox"/> | unknown                                         | <input type="checkbox"/> |
| What was reviewed (tick multiple if required) and how frequently (delete as appropriate)? | Constitution of PN                                 | <input type="checkbox"/> | Daily /weekly                                   |                          |
|                                                                                           | Biochemical review                                 | <input type="checkbox"/> | Daily/ weekly                                   |                          |
|                                                                                           | Clinical status                                    | <input type="checkbox"/> | Daily /weekly                                   |                          |
|                                                                                           | Ongoing need for PN                                | <input type="checkbox"/> | Daily/ weekly                                   |                          |
|                                                                                           | Weight                                             | <input type="checkbox"/> | Daily /weekly                                   |                          |
|                                                                                           | Vascular access                                    | <input type="checkbox"/> | Daily/ weekly                                   |                          |
|                                                                                           | Anthropometry                                      | <input type="checkbox"/> | Daily/ weekly                                   |                          |

**Indication for PN**

|                                                                                                          |                               |                          |                                 |                          |
|----------------------------------------------------------------------------------------------------------|-------------------------------|--------------------------|---------------------------------|--------------------------|
| What was the indication (whether documented or not)<br><br>Please tick the box which is most appropriate | Congenital anomalies; gut     | <input type="checkbox"/> | No access for enteral nutrition | <input type="checkbox"/> |
|                                                                                                          | Congenital anomalies; non gut | <input type="checkbox"/> | Pre-operative nutrition         | <input type="checkbox"/> |
|                                                                                                          | Necrotizing enterocolitis     | <input type="checkbox"/> | Radiation enteritis             | <input type="checkbox"/> |
|                                                                                                          | Non functioning gut           | <input type="checkbox"/> | Infection (e.g. C.difficile)    | <input type="checkbox"/> |
|                                                                                                          | Perforated / leaking gut      | <input type="checkbox"/> | Chemotherapy                    | <input type="checkbox"/> |
|                                                                                                          | Short bowel                   | <input type="checkbox"/> | Post-surgical complications     | <input type="checkbox"/> |
|                                                                                                          | Dysphagia                     | <input type="checkbox"/> | Volvulus                        | <input type="checkbox"/> |
|                                                                                                          | Obstruction                   | <input type="checkbox"/> | Crohn's disease                 | <input type="checkbox"/> |
|                                                                                                          | Dysmotility                   | <input type="checkbox"/> | Cancer                          | <input type="checkbox"/> |
|                                                                                                          | Fistulae                      | <input type="checkbox"/> | Post-op ileus                   | <input type="checkbox"/> |
|                                                                                                          | Malabsorption                 | <input type="checkbox"/> | Other                           | <input type="checkbox"/> |
| If 'Other', please state                                                                                 |                               |                          |                                 |                          |
| Was an indication for PN recorded in the case notes?                                                     |                               |                          | Yes/No                          |                          |
| Was the Nutrition team involved in the decision to commence PN?                                          |                               |                          | Yes/No/Unknown                  |                          |
| If 'No', please expand on your answer                                                                    |                               |                          |                                 |                          |
| Was a treatment goal documented?                                                                         |                               |                          | Yes/No                          |                          |
| If 'Yes', what was this? e.g. optimisation of nutrition pre-surgery                                      |                               |                          |                                 |                          |
| Was EN given to prior to PN?                                                                             | Not possible                  | <input type="checkbox"/> | Trial of EN unsuccessful        | <input type="checkbox"/> |
|                                                                                                          | Dual therapy                  | <input type="checkbox"/> | Not documented                  | <input type="checkbox"/> |

**Venous Access / Line Care (where multiple, please use new page for each new line used)**

|                                                                          |                                                 |                          |                         |  |
|--------------------------------------------------------------------------|-------------------------------------------------|--------------------------|-------------------------|--|
| Was the type line used for PN documented in the case notes?              |                                                 |                          | Yes/No                  |  |
| What type of line used (delete details as appropriate for central line)? | Central line                                    | <input type="checkbox"/> | Tunnelled/Not tunnelled |  |
|                                                                          |                                                 |                          | Single/Multilumen       |  |
|                                                                          | Peripherally inserted central line (PICC)       | <input type="checkbox"/> |                         |  |
|                                                                          | Peripherally inserted long line (e.g. Mid-line) | <input type="checkbox"/> |                         |  |

|                                                                     |                                     |                          |                          |                          |
|---------------------------------------------------------------------|-------------------------------------|--------------------------|--------------------------|--------------------------|
|                                                                     | Standard Peripheral cannula         | <input type="checkbox"/> |                          |                          |
| Was the insertion of the feeding line documented in the case notes? |                                     | Yes/No                   |                          |                          |
| Was aseptic technique documented?                                   |                                     | Yes/No                   |                          |                          |
| Speciality and grade of the operator inserting the line?            |                                     | Not documented           | <input type="checkbox"/> |                          |
| Was the position of the tip documented?                             |                                     | Yes/No                   |                          |                          |
| Did the patient develop any line-related complications              |                                     | Yes/No                   |                          |                          |
| If 'Yes', which complications?                                      | Line misplacement                   | <input type="checkbox"/> | Line occlusion           | <input type="checkbox"/> |
|                                                                     | Line site infection                 | <input type="checkbox"/> | Venous thrombosis        | <input type="checkbox"/> |
|                                                                     | Suspected systemic line infection*  | <input type="checkbox"/> | Line fracture/rupture    | <input type="checkbox"/> |
|                                                                     | Confirmed systemic line infection * | <input type="checkbox"/> | Pneumothorax             | <input type="checkbox"/> |
|                                                                     | Phlebitis                           | <input type="checkbox"/> | Haemathorax              | <input type="checkbox"/> |
|                                                                     | Accidental removal                  | <input type="checkbox"/> | TPN extravasation        | <input type="checkbox"/> |
|                                                                     | Nerve damage                        | <input type="checkbox"/> | <i>Other</i>             | <input type="checkbox"/> |
| Was PN interrupted by a line complication?                          | Yes                                 | <input type="checkbox"/> | No                       | <input type="checkbox"/> |

### **Metabolic Complications**

|                                                                                                                        |                   |                          |                                     |                          |
|------------------------------------------------------------------------------------------------------------------------|-------------------|--------------------------|-------------------------------------|--------------------------|
| Did the patient develop any metabolic complications?                                                                   | Yes               | <input type="checkbox"/> | No                                  | <input type="checkbox"/> |
| If 'Yes', which complications?<br>(Please your hospital's reference range for electrolytes to define abnormal results) | Hypophosphataemia | <input type="checkbox"/> | Hypermagnesaemia                    | <input type="checkbox"/> |
|                                                                                                                        | Hypomagnesaemia   | <input type="checkbox"/> | Hyperphosphataemia                  | <input type="checkbox"/> |
|                                                                                                                        | Hypokalaemia      | <input type="checkbox"/> | Hyperkalaemia                       | <input type="checkbox"/> |
|                                                                                                                        | Hyponatraemia     | <input type="checkbox"/> | Hyperglycaemia                      | <input type="checkbox"/> |
|                                                                                                                        | Hypernatraemia    | <input type="checkbox"/> | Abnormal LFTs<br>(but not jaundice) | <input type="checkbox"/> |
|                                                                                                                        |                   |                          |                                     | Jaundice                 |
| If the patient had abnormal LFTs how much glucose cal/kg body weight/day did they receive from PN?                     |                   |                          |                                     |                          |
| If the patient had abnormal LFTs how much Fat g/kg body weight/day did they receive from PN?                           |                   |                          |                                     |                          |
| In your opinion were any of the complications avoidable?                                                               | Yes               | <input type="checkbox"/> | No                                  | <input type="checkbox"/> |
|                                                                                                                        | Unknown           | <input type="checkbox"/> | N/A                                 | <input type="checkbox"/> |
| If 'Yes', please expand on your answer                                                                                 |                   |                          |                                     |                          |

|                                                                                    |                                  |                          |                                     |                          |           |                          |
|------------------------------------------------------------------------------------|----------------------------------|--------------------------|-------------------------------------|--------------------------|-----------|--------------------------|
| Were the complications managed appropriately?                                      | Yes                              | <input type="checkbox"/> | No                                  | <input type="checkbox"/> |           |                          |
|                                                                                    | Unknown                          | <input type="checkbox"/> | N/A                                 | <input type="checkbox"/> |           |                          |
| If 'No', please expand on your answer                                              |                                  |                          |                                     |                          |           |                          |
| Were IV fluids given in addition to the PN during the first 2 weeks of PN therapy? | Yes/No/Unknown                   |                          |                                     |                          |           |                          |
| If 'Yes', was this: (tick all that apply)                                          | To correct deficit               | <input type="checkbox"/> | Routine maintenance fluid provision | <input type="checkbox"/> |           |                          |
|                                                                                    | To correct ongoing losses        | <input type="checkbox"/> | No indication documented            | <input type="checkbox"/> |           |                          |
|                                                                                    | Other, please state              | <input type="checkbox"/> |                                     |                          |           |                          |
| What type of fluid was given?                                                      | Saline                           | <input type="checkbox"/> | Colliod                             | <input type="checkbox"/> | Hartmanns | <input type="checkbox"/> |
| What volume of fluid was given?                                                    |                                  |                          |                                     |                          |           |                          |
| Duration of PN (days)                                                              |                                  |                          |                                     |                          |           |                          |
| What was the outcome for this patient at 30 days? (tick all that apply)            | Weaned onto oral/enteral feeding | <input type="checkbox"/> | Discharged home                     | <input type="checkbox"/> |           |                          |
|                                                                                    | Home parenteral nutrition        | <input type="checkbox"/> | Died during hospital stay           | <input type="checkbox"/> |           |                          |
|                                                                                    | Transferred to other unit        | <input type="checkbox"/> |                                     |                          |           |                          |

Comments:

\*Suspected line infection: Positive blood cultures and evidence of sepsis (fevers, hypotension etc) with no obvious source other than line.

\*Confirmed line infection: A recognised pathogen cultured from one or more blood cultures and the organism cultured from blood is not related to an infection at another site. Or a common commensal (i.e., diphtheroids [*Corynebacterium* spp. not *C. diphtheriae*], *Bacillus* spp. [not *B. anthracis*], *Propionibacterium* spp., coagulase-negative staphylococci [including *S. epidermidis*], viridans group streptococci, *Aerococcus* spp., and *Micrococcus* spp.) cultured from two or more blood cultures drawn on separate occasions and evidence of sepsis and positive laboratory results are not related to an infection at another site
